# Supplementary material for: An economical and simple method for preparing highly permeable and chlorine-resistant reverse osmosis membranes with potential commercial applications
Source: Royal Society of Chemistry journal article supplement (doi:10.1039/d3ra06015b), 2023-01-01
Supplement: d3ra06015b1.pdf [file d3ra06015b1.pdf]

## Supplementary Material

### An economical and simple method for preparing highly permeable and chlorine-resistant reverse osmosis membranes with potential commercial applications

Junqing Sun<sup>a</sup>, Qianwen Zhang<sup>b</sup>, Wenjing Xue<sup>a</sup>, Wande Ding<sup>a,c,\*</sup>, Kefeng Zhang<sup>a</sup>, Shan  
Wang<sup>a\*</sup>

<sup>a</sup> School of Municipal and Environmental Engineering, Shandong Jianzhu University,  
Jinan, 250101, China

<sup>b</sup> School of Environment, Tsinghua University, Beijing, 100084

<sup>c</sup> Shandong Shuifa Environmental Technology Co., Ltd, Jining, 272000, China

\*Corresponding author: Wande Ding, E-mail address: [dingwande18@sdjzu.edu.cn](mailto:dingwande18@sdjzu.edu.cn);

Shan Wang, E-mail address: [14045@sdjzu.edu.cn](mailto:14045@sdjzu.edu.cn)

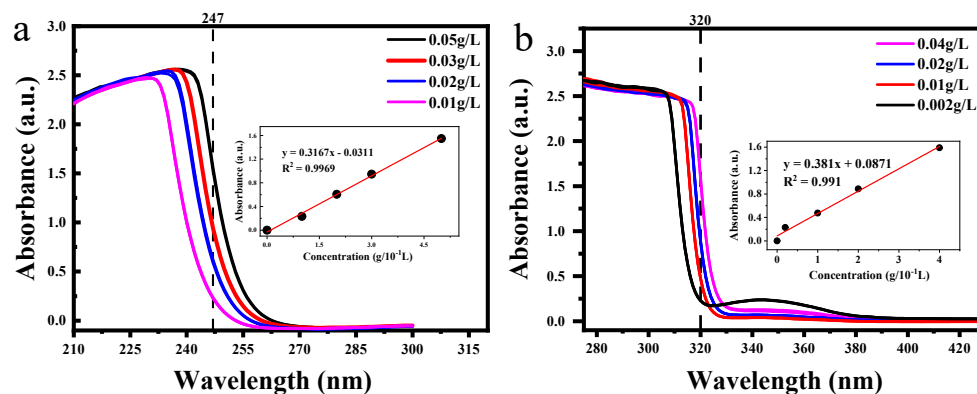

Fig. S1. (a) Relationship between PIP concentration and absorbance and (b) relationship between  
MPD concentration and absorbance

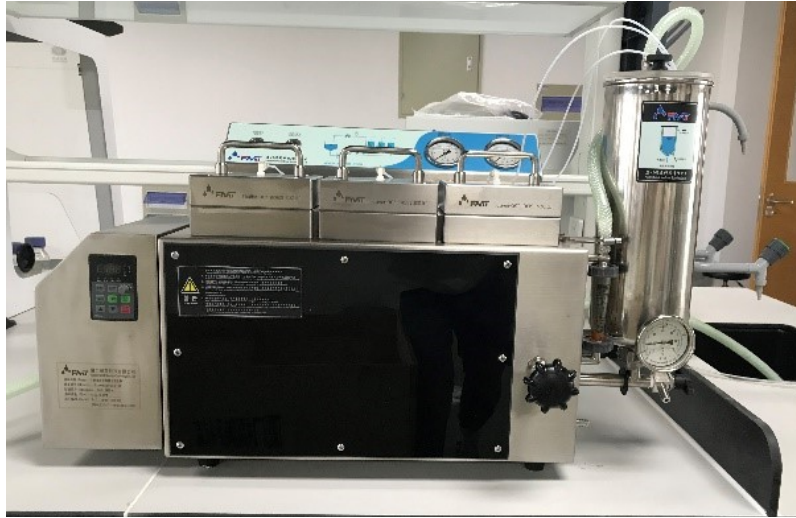

Fig. S2. Experimental setup of RO

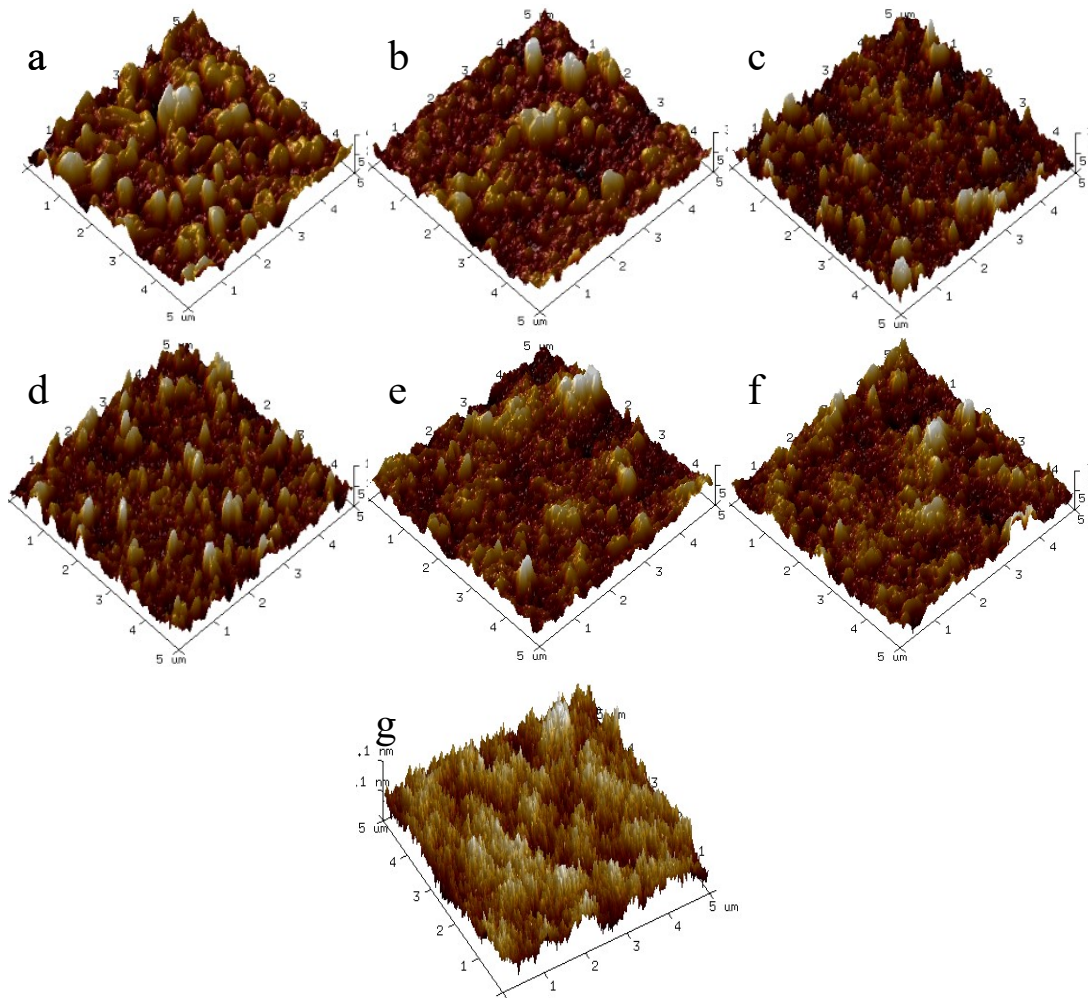

Fig. S3. 3D AFM images of TFC<sub>W</sub> membranes corresponding to the flat AFM images in the manuscript

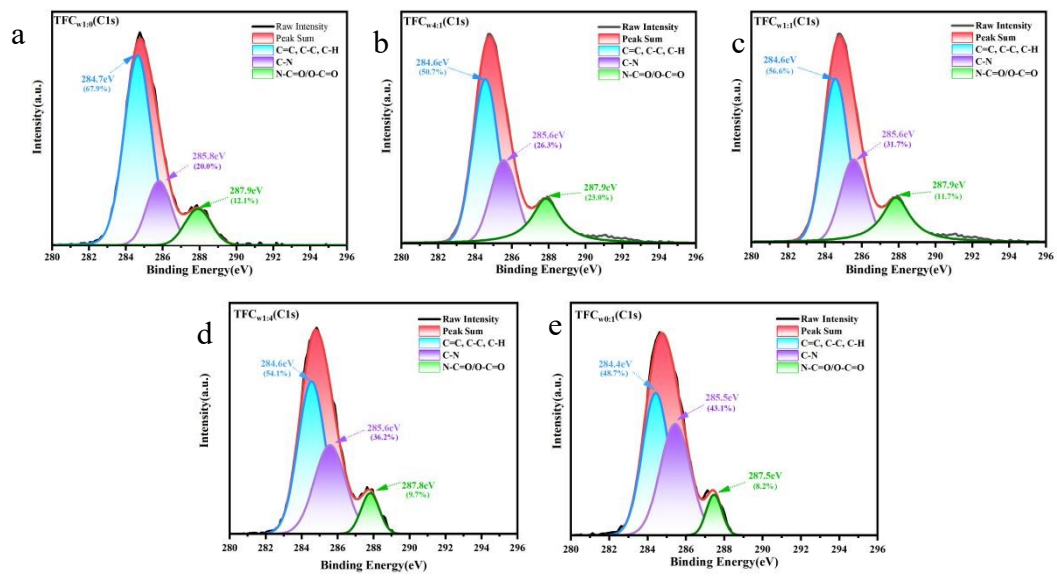

Fig. S4 C1s deconvoluted peaks in XPS spectra.

Table S1 XPS results of the TFC<sub>W</sub> membranes

| Membrane             | Cl s        |               |      | N 1s        |                                                                |      | O 1s        |                     |      |
|----------------------|-------------|---------------|------|-------------|----------------------------------------------------------------|------|-------------|---------------------|------|
|                      | Energy (eV) | Species       | (%)  | Energy (eV) | Species                                                        | (%)  | Energy (eV) | Species             | (%)  |
| TFC <sub>W-1:0</sub> | 284.7       | C=C, C-C, C-H | 67.9 | 398.9       | C-NH <sub>2</sub>                                              | 10.8 | 531.2       | N-C=O/O-C=O         | 62.7 |
|                      | 285.8       | C-N           | 20   | 400         | N-C=O                                                          | 80.3 | 532.3       | N-C=O...H/O-C=O...H | 24.1 |
|                      | 287.9       | N-C=O/O-C=O   | 12.1 | 401.3       | C-NH <sub>3</sub> <sup>+</sup>                                 | 8.9  | 533.6       | O-C=O               | 13.2 |
| TFC <sub>W-4:1</sub> | 284.6       | C=C, C-C, C-H | 50.7 | 398.9       | C-NH/C-NH <sub>2</sub>                                         | 17.1 | 531.2       | N-C=O/O-C=O         | 64.7 |
|                      | 285.6       | C-N           | 26.3 | 399.9       | N-C=O                                                          | 76.6 | 532.3       | N-C=O...H/O-C=O...H | 18.4 |
|                      | 287.9       | N-C=O/O-C=O   | 23   | 401.3       | C-NH <sub>2</sub> <sup>+</sup> /C-NH <sub>3</sub> <sup>+</sup> | 6.3  | 533.5       | O-C=O               | 16.8 |
| TFC <sub>W-1:1</sub> | 284.8       | C=C, C-C, C-H | 56.6 | 398.9       | C-NH/C-NH <sub>2</sub>                                         | 11.1 | 531.1       | N-C=O/O-C=O         | 51.2 |
|                      | 285.8       | C-N           | 31.7 | 399.9       | N-C=O                                                          | 74.8 | 531.9       | N-C=O...H/O-C=O...H | 28.7 |
|                      | 288.2       | N-C=O/O-C=O   | 11.7 | 400.9       | C-NH <sub>2</sub> <sup>+</sup> /C-NH <sub>3</sub> <sup>+</sup> | 14.1 | 533.5       | O-C=O               | 20.1 |
| TFC <sub>W-1:4</sub> | 284.6       | C=C, C-C, C-H | 54.1 | 399         | C-NH/C-NH <sub>2</sub>                                         | 20.8 | 531.1       | N-C=O/O-C=O         | 65.6 |
|                      | 285.6       | C-N           | 36.2 | 399.9       | N-C=O                                                          | 75.2 | 532.1       | N-C=O...H/O-C=O...H | 18.8 |
|                      | 287.8       | N-C=O/O-C=O   | 9.7  | 401.4       | C-NH <sub>2</sub> <sup>+</sup> /C-NH <sub>3</sub> <sup>+</sup> | 4.0  | 533.2       | O-C=O               | 15.6 |
| TFC <sub>W-0:1</sub> | 284.4       | C=C, C-C, C-H | 48.7 | 398.9       | C-NH                                                           | 16.5 | 530.8       | N-C=O/O-C=O         | 64.4 |
|                      | 285.5       | C-N           | 43.1 | 399.6       | N-C=O                                                          | 77.1 | 531.7       | N-C=O...H/O-C=O...H | 25.5 |
|                      | 287.5       | N-C=O/O-C=O   | 8.2  | 401.3       | C-NH <sub>2</sub> <sup>+</sup>                                 | 6.4  | 533         | O-C=O               | 10.1 |
